# Supplementary material
Source: PubMed Central journal article supplement (PMC6589127)

**Supplemental Figure 1. Diagram of SEM for standardized (standard errors) and indirect effects of neighborhood disadvantage effects in adolescence, emerging adulthood, and young adulthood on adult metabolic syndrome, Add Health. Solid black lines represent direct and indirect effects; gray lines represent potential confounding pathways. \* $P < 0.05$ ; \*\* $P < 0.001$  (RMSEA = 0.020; CFI=0.913; SRMR = 0.065)**

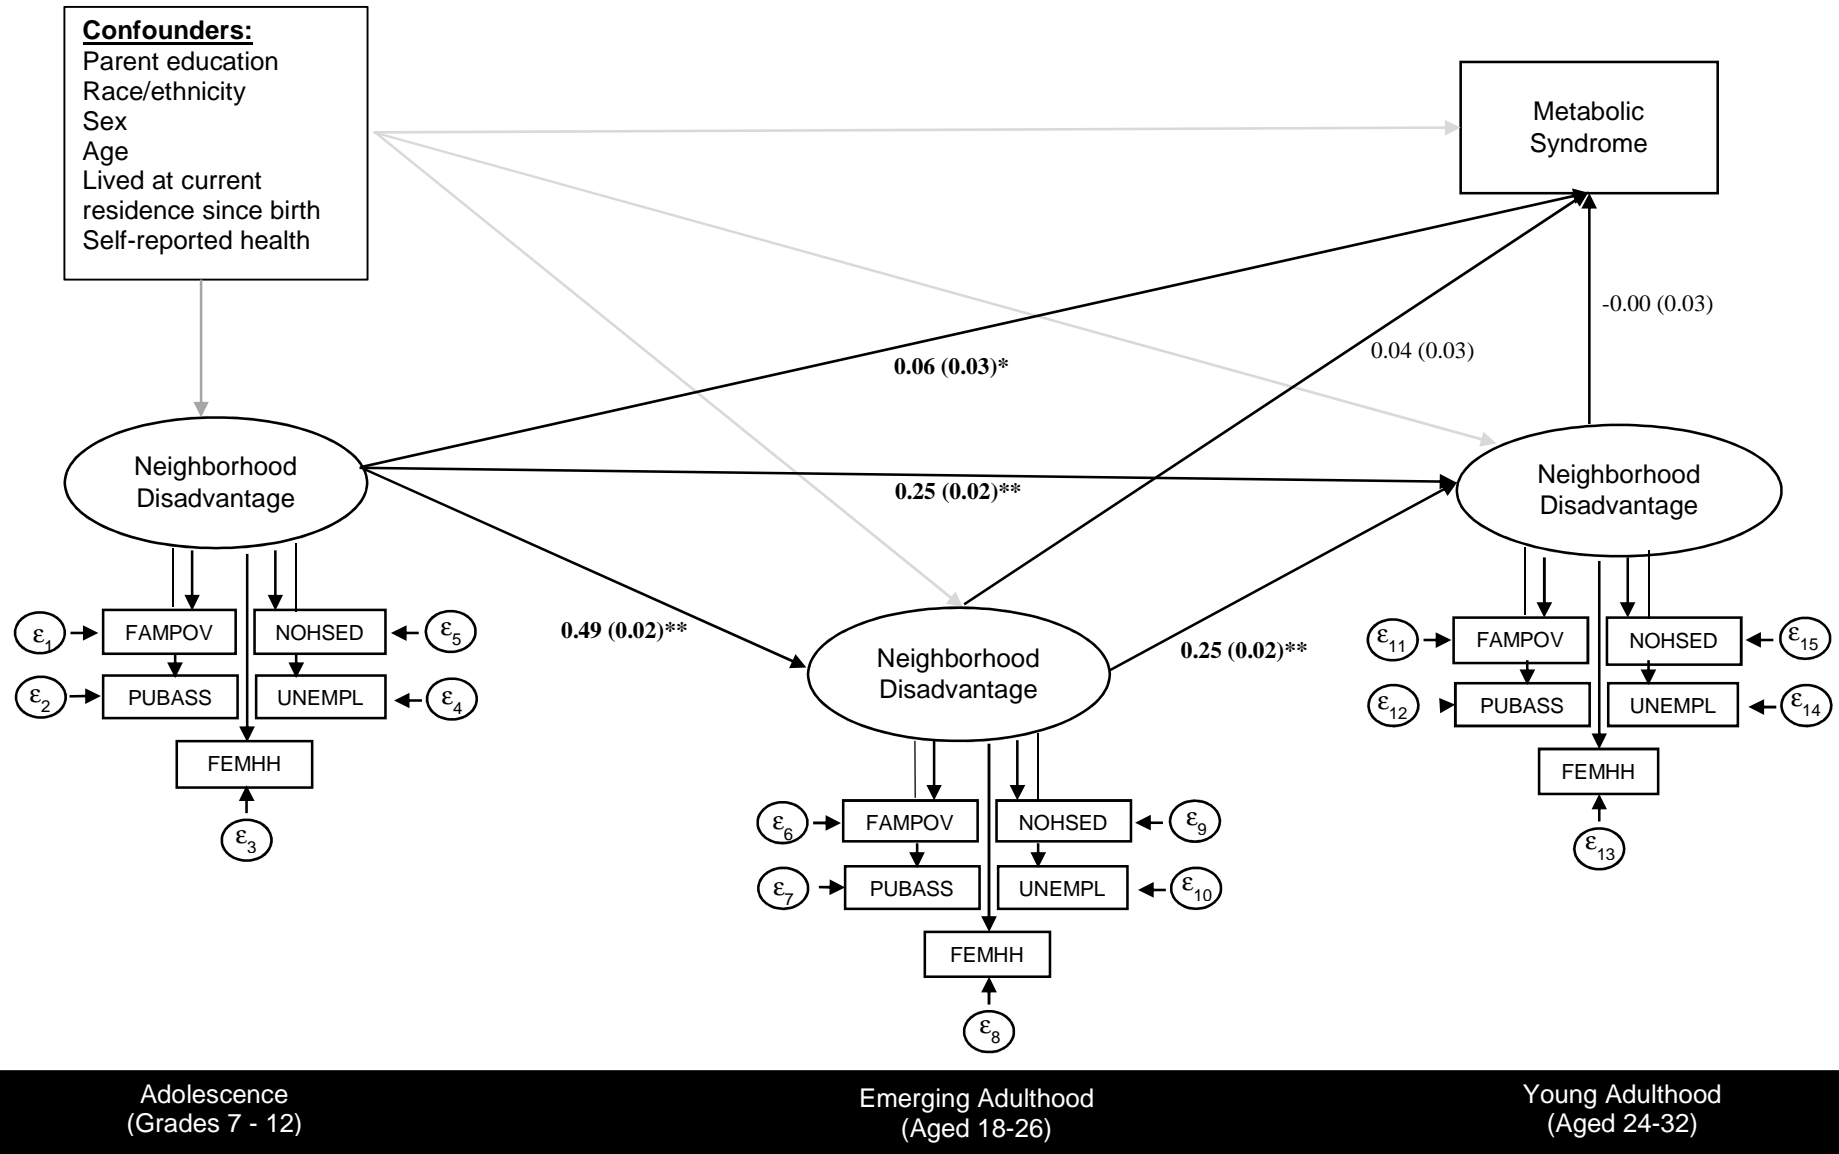

Supplement: NIHMS1525949-supplement-3.pdf [file NIHMS1525949-supplement-3.pdf]
